# Supplementary material for: Analysis of the Necrosis-Inducing Components of the Venom of Naja atra and Assessment of the Neutralization Ability of Freeze-Dried Antivenom
Source: MDPI journal article supplement (doi:10.3390/toxins13090619), 2021-09-02
Supplement: s1 [file s1]

# Supplementary Materials: Analysis of the Necrosis-Inducing Components of the Venom of *Naja atra* and Assessment of the Neutralization Ability of Freeze-Dried Antivenom

Cheng-Hsuan Ho, Liao-Chun Chiang, Yan-Chiao Mao, Kuo-Cheng Lan, Shih-Hung Tsai, Yu-Jen Shih, Yuan-Sheng Tzeng, Chin-Sheng Lin, Wen-Loung Lin, Wei-Hsuan Fang, Kuang-Ting Chen, Chi-Hsin Lee, Dapi-Meng Lin Chiang, Shing-Hwa Liu \*

Table S1. Necrosis score with different D-NTX doses (each group contain six mice).

| deNTXs dosage       | 0.5 μg/g |   |   |   |   |   | 0.33 μg/g |   |   |   |   |   | 0.22 μg/g |   |   |   |   |   | 0.148 μg/g |   |   |   |   |   | 0.098 μg/g |   |   |   |   |   |   |
|---------------------|----------|---|---|---|---|---|-----------|---|---|---|---|---|-----------|---|---|---|---|---|------------|---|---|---|---|---|------------|---|---|---|---|---|---|
| Epidermis           | 3        | 0 | 4 | 0 | 4 | 3 | 4         | 4 | 3 | 3 | 0 | 0 | 3         | 4 | 4 | 0 | 0 | 4 | 3          | 3 | 0 | 0 | 2 | 0 | 0          | 0 | 0 | 3 | 0 | 0 |   |
| Dermis              | 3        | 0 | 4 | 0 | 4 | 4 | 4         | 4 | 4 | 4 | 0 | 0 | 3         | 4 | 4 | 0 | 2 | 4 | 3          | 3 | 0 | 0 | 3 | 0 | 0          | 0 | 0 | 3 | 0 | 0 |   |
| Hypodermis          | 3        | 0 | 4 | 0 | 4 | 4 | 4         | 3 | 3 | 3 | 0 | 0 | 4         | 4 | 4 | 0 | 3 | 4 | 4          | 3 | 0 | 0 | 3 | 0 | 0          | 0 | 0 | 3 | 2 | 1 |   |
| Panniculus carnosus | 4        | 4 | 4 | 4 | 4 | 4 | 4         | 4 | 4 | 4 | 3 | 3 | 4         | 4 | 3 | 4 | 4 | 4 | 4          | 3 | 3 | 3 | 3 | 4 | 4          | 3 | 3 | 1 | 4 | 2 | 2 |
| Adventitia          | 3        | 3 | 4 | 4 | 4 | 4 | 4         | 4 | 4 | 4 | 4 | 4 | 4         | 4 | 4 | 3 | 4 | 4 | 4          | 3 | 2 | 2 | 4 | 4 | 2          | 2 | 1 | 3 | 3 | 3 |   |

Table S2. Necrosis score under fixed D-NTX doses (2MND) and different dilution times of AV (each group contain five mice).

| Antivenom           | A1        | A2        | A3        | A4        | A5        | A6        |
|---------------------|-----------|-----------|-----------|-----------|-----------|-----------|
| Epidermis           | 3 0 3 3 3 | 3 0 4 4 0 | 0 3 0 0 0 | 4 3 3 1 0 | 0 4 4 2 0 | 0 3 3 0 3 |
| Dermis              | 3 0 4 3 4 | 3 0 4 4 0 | 0 3 0 0 0 | 4 3 3 1 0 | 0 4 4 0 0 | 0 3 3 0 3 |
| Hypodermis          | 3 2 3 3 4 | 3 0 4 4 0 | 0 3 0 0 0 | 2 3 2 2 0 | 0 4 4 3 0 | 0 3 3 0 3 |
| Panniculus carnosus | 4 4 4 4 3 | 3 0 3 3 3 | 0 0 4 4 4 | 2 4 4 3 3 | 4 3 3 4 4 | 2 3 3 4 3 |
| Adventitia          | 2 2 4 3 3 | 2 0 4 4 3 | 0 1 4 4 3 | 0 0 1 3 3 | 3 4 4 3 3 | 2 3 3 3 3 |

# A1: original AV concentration; A2: 1:1 dilution ; A3: 1:2 dilution ; A4: 1:3 dilution ; A5: 1:4 dilution ; A6: 1:5 dilution.
